# Supplementary material for: Regulation of nitrous oxide production in low-oxygen waters off the coast of Peru
Source: Copernicus journal article supplement (doi:10.5194/bg-17-2263-2020), 2020-04-22
Supplement: Supplementary file 1 [file bg-17-2263-2020-supplement.pdf]

Supplement of Biogeosciences, 17, 2263–2287, 2020  
<https://doi.org/10.5194/bg-17-2263-2020-supplement>  
© Author(s) 2020. This work is distributed under  
the Creative Commons Attribution 4.0 License.

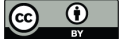

*Supplement of*

## **Regulation of nitrous oxide production in low-oxygen waters off the coast of Peru**

**Claudia Frey et al.**

*Correspondence to:* Claudia Frey ([claudia.frey@unibas.ch](mailto:claudia.frey@unibas.ch))

The copyright of individual parts of the supplement might differ from the CC BY 4.0 License.

**Table S1:** Average alpha diversities of total and active archaeal *amoA* and *nirS* communities.

|      | <i>nirS</i> | <i>amoA</i> |
|------|-------------|-------------|
| DNA  | 3.8 ± 0.4   | 3.6 ± 0.1   |
| cDNA | 3.4 ± 0.5   | 3.2 ± 0.3   |

**Table S2:** Overview of abundant archetypes (> 1%) that are significantly enriched in respective O<sub>2</sub> levels (Lefse analysis). O<sub>2</sub> levels were split in 3 categories: anoxic (<1 μmol L<sup>-1</sup> O<sub>2</sub>, Seabird O<sub>2</sub> and Winkler titration detection limits), hypoxic (1 – 10 μmol L<sup>-1</sup> O<sub>2</sub>), oxic (> 10 μmol L<sup>-1</sup> O<sub>2</sub>).

| <i>amoA</i> | archetype | anoxic | hypoxic | oxic | <i>nirS</i> | archetype | anoxic | hypoxic | oxic |
|-------------|-----------|--------|---------|------|-------------|-----------|--------|---------|------|
| DNA         | AOA3      |        |         | x    | DNA         | nir4      |        |         | x    |
|             | AOA7      | x      |         |      |             | nir14     |        |         | x    |
|             | AOA78     |        |         | x    |             | nir23     | x      |         |      |
|             | AOA83     |        |         | x    |             | nir46     | x      |         |      |
|             |           |        |         |      |             | nir166    | x      |         |      |
| cDNA        | AOA3      |        |         | x    | cDNA        | nir4      |        |         | x    |
|             | AOA7      |        | x       |      |             | nir14     |        |         | x    |
|             | AOA83     |        |         | x    |             | nir23     | x      |         |      |
|             |           |        |         |      |             | nir141    |        |         | x    |
|             |           |        |         |      |             | nir166    | x      |         |      |

**Table S3:** All samples with rates, standard errors, fraction label ( $f_N$ ), yields, copy numbers mL<sup>-1</sup> of *nirS* and *amoA* genes and transcripts.

| sample ID | station | depth (m) | oxygen ( $\mu$ M) | $f_{NH4+}$ | $f_{NO2-}$ | $f_{NO3-}$ | NZO pro (nM/d) NH4- | SE    | %hybrid from total NZO | NH4 ox (nM/d) | SE    | NZO Yield (%) NH4+ | SE   | NZO pro (nM/d) NO2- | SE   | %hybrid from total NZO | NZO pro (nM/d) NO3- | SE    | NO3- reduction (nM/d) | SE    | NZO Yield (%) NO3- | SE   | NZO pro (nM/d) NO3- | SE      | nirS gene copy numbers *nL <sup>-1</sup> | STD     | nirS transcript copy numbers *nL <sup>-1</sup> | STD   | amoA gene copy numbers *nL <sup>-1</sup> | STD  | amoA transcript copy numbers *nL <sup>-1</sup> | STD |
|-----------|---------|-----------|-------------------|------------|------------|------------|---------------------|-------|------------------------|---------------|-------|--------------------|------|---------------------|------|------------------------|---------------------|-------|-----------------------|-------|--------------------|------|---------------------|---------|------------------------------------------|---------|------------------------------------------------|-------|------------------------------------------|------|------------------------------------------------|-----|
| S1        | 882     | 298       | 0.2               | 0.98       | 0.45       | 0.058      | 0.0                 | 0.002 | -                      | 0.89          | 0.22  | nd                 | 0.00 | 0.04                | 0.00 | 0.000                  | 2.67                | 0.39  | 7.20                  | 1.7   | 42.53              | 0.28 | 412319.0            | 1879.7  | 2707.3                                   | 135.7   | 2548.1                                         | 17.3  | 30.6                                     | 12.2 |                                                |     |
| S2        | 882     | 352.6     | bd                | 0.97       | 0.39       | 0.055      | 0.0                 | 0.001 | -                      | 0.00          | 0.24  | nd                 | 0.00 | 0.09                | 0.03 | 18.98                  | 2.20                | 0.35  | 19.42                 | 8.3   | 18.49              | 0.45 | 530804.0            | 36269.9 | 4880.8                                   | 362.9   | 4082.7                                         | 259.3 | 143.4                                    | 10.4 |                                                |     |
| S3        | 882     | 258.7     | 1.5               | 0.99       | 0.22       | 0.059      | 0.0053              | 0.000 | 77.8                   | 3.62          | 1.21  | 1.40               | 0.49 | 0.11                | 0.02 | 21.9                   | 1.36                | 0.61  | 14.8                  | 1.5   | 15.45              | 0.46 | 116275.5            | 3138.8  | 424.9                                    | 17.4    | 974.8                                          | 97.2  | 20.6                                     | 0.8  |                                                |     |
| S4        | 882     | 218.9     | 6.06              | 0.97       | 0.77       | 0.056      | 0.0310              | 0.000 | 78.1                   | 8.00          | 1.69  | 0.78               | 0.18 | 0.06                | 0.01 | 63.6                   | 1.05                | 0.47  | 7.53                  | 2.1   | 21.76              | 0.53 | 81055.2             | 10685.0 | 829.8                                    | 45.9    | 2018.8                                         | 187.6 | 240.9                                    | 41.4 |                                                |     |
| S5        | 882     | 73.9      | 8.4               | 0.98       | 0.95       | 0.059      | 0.1411              | 0.003 | 79.4                   | 35.71         | 9.07  | 0.79               | 0.43 | 0.02                | 0.00 | 79.2                   | 0.00                | 0.78  | 5.90                  | 2.4   | 0.00               | 0.00 | 19971.7             | 1455.5  | 54.8                                     | 22.1    | 14462.8                                        | 656.3 | 628.4                                    | 10.0 |                                                |     |
| S6        | 883     | 304.1     | bd                | 0.99       | 0.21       | 0.064      | 0.0                 | 0.001 | -                      | 0.33          | 0.99  | nd                 | 0.00 | 0.29                | 0.29 | 37.16                  | 1.57                | 0.32  | 34.67                 | 5.59  | 8.30               | 0.36 | 618285.8            | 19727.5 | 2716.5                                   | 247.3   | 4000.4                                         | 99.9  | 44.0                                     | 10.8 |                                                |     |
| S7        | 883     | 268.1     | 0.2               | 0.99       | 0.18       | 0.065      | 0.0                 | 0.001 | -                      | 0.98          | 0.30  | nd                 | 0.00 | 0.71                | 0.38 | 0.00                   | 5.65                | 2.82  | 46.65                 | 6.97  | 19.49              | 0.52 | 293503.7            | 45312.4 | 1749.2                                   | 198.9   | 1920.1                                         | 21.8  | 47.3                                     | 0.2  |                                                |     |
| S8        | 883     | 249.4     | 2.25              | 0.99       | 0.21       | 0.062      | 0.0017              | 0.000 | 83.3                   | 0.95          | 0.40  | 0.35               | 0.35 | 0.20                | 0.07 | 0.00                   | 2.62                | 0.90  | 17.44                 | 4.61  | 23.11              | 0.43 | 372479.5            | 1698.1  | 4006.6                                   | 690.7   | 2601.8                                         | 124.0 | 104.8                                    | 3.1  |                                                |     |
| S9        | 883     | 189       | 1.6               | 0.99       | 0.99       | 0.058      | 0.0647              | 0.001 | 83.8                   | 10.94         | 1.27  | 1.18               | 0.31 | 0.14                | 0.02 | 88.04                  | 1.05                | 0.77  | 15.08                 | 1.61  | 12.20              | 0.75 | 16892.7             | 539.0   | 48.9                                     | 0.7     | 18113.5                                        | 452.2 | 626.2                                    | 29.8 |                                                |     |
| S10       | 883     | 28        | 30.1              | 0.99       | 0.91       | 0.065      | 0.1596              | 0.003 | 86.6                   | 34.07         | 0.11  | 0.94               | 0.42 | 0.07                | 0.03 | 52.79                  | 0.00                | 2.53  | 13.49                 | 4.44  | 0.00               | 0.00 | 6331.1              | 86.6    | 42.1                                     | 5.0     | 24513.8                                        | 389.5 | 521.7                                    | 8.3  |                                                |     |
| S11       | 894     | 118.9     | bd                | 0.98       | 0.96       | 0.060      | 0.0879              | 0.001 | 78.9                   | 2.71          | 1.01  | 0.27               | 0.14 | 0.09                | 0.01 | 76.3                   | 5.86                | 0.48  | 6.4                   | 2.1   | 64.86              | 0.34 | 185531.9            | 845.8   | 2421.5                                   | 15.44   | 6800.4                                         | 15.4  | 284.8                                    | 7.4  |                                                |     |
| S12       | 904     | 179.4     | bd                | nd         | nd         | 0.070      | nd                  | nd    | nd                     | nd            | nd    | nd                 | nd   | 0.19                | 0.06 | 0.00                   | 4.39                | 0.77  | 8.47                  | 4.05  | 50.90              | 0.51 | 426523.5            | 1944.5  | 4347.9                                   | 632.0   | 6000.2                                         | 108.9 | 233.5                                    | 8.5  |                                                |     |
| S13       | 904     | 124.0     | 0.25              | nd         | 0.82       | 0.060      | nd                  | nd    | nd                     | nd            | nd    | nd                 | nd   | 0.16                | 0.00 | 90.52                  | 7.20                | 1.64  | 9.06                  | 2.62  | 61.40              | 0.37 | 153881.6            | 2806.0  | 562.2                                    | 74.1    | 6435.6                                         | 14.6  | 198.2                                    | 10.3 |                                                |     |
| S14       | 906     | 147.1     | bd                | nd         | 0.33       | 0.070      | nd                  | nd    | nd                     | nd            | nd    | nd                 | nd   | 0.32                | 0.07 | 13.67                  | 3.63                | 0.28  | 38.0                  | 11.7  | 16.05              | 0.32 | 318507.1            | 1452.0  | 2104.1                                   | 67.1    | 6031.7                                         | 150.6 | 88.7                                     | 14.2 |                                                |     |
| S15       | 907     | 130       | 0.44              | 0.97       | 0.25       | 0.110      | 0.0180              | 0.000 | 82.0                   | 11.38         | 1.80  | 0.32               | 0.13 | 0.30                | 0.10 | 39.3                   | 1.23                | 0.23  | 17.51                 | 4.66  | 12.36              | 0.32 | 729635.6            | 3326.3  | 4276.9                                   | 0.0     | 4212.9                                         | 143.4 | 140.6                                    | 8.6  |                                                |     |
| S16       | 907     | 9.2       | 209.3             | nd         | nd         | nd         | nd                  | nd    | nd                     | nd            | nd    | nd                 | nd   | nd                  | nd   | 83.55                  | 118.00              | 27.80 | 32.50                 | 12.38 | 87.8               | 39.3 | 789262.1            | 21586.2 | 9472.8                                   | 647.3   | 3077.8                                         | 7.0   | 246.6                                    | 5.0  |                                                |     |
| S17       | 912     | 89.8      | 1.44              | 0.97       | 0.38       | 0.090      | 0.1227              | 0.002 | 80.2                   | 11.86         | 1.90  | 2.07               | 0.34 | 3.06                | 1.17 | 83.55                  | 118.00              | 27.80 | 32.50                 | 12.38 | 87.8               | 39.3 | 789262.1            | 21586.2 | 9472.8                                   | 647.3   | 3077.8                                         | 7.0   | 246.6                                    | 5.0  |                                                |     |
| S18       | 912     | 4.7       | 204.5             | nd         | nd         | nd         | nd                  | nd    | nd                     | nd            | nd    | nd                 | nd   | nd                  | nd   | 83.55                  | 118.00              | 27.80 | 32.50                 | 12.38 | 87.8               | 39.3 | 789262.1            | 21586.2 | 9472.8                                   | 647.3   | 3077.8                                         | 7.0   | 246.6                                    | 5.0  |                                                |     |
| S19       | 892     | 143.7     | bd                | 0.76       | 0.11       | 0.090      | 0.0337              | 0.000 | 71.0                   | 1.79          | 0.356 | 0.16               | 0.05 | 0.72                | 0.19 | 0.0                    | 1.63                | 0.30  | 12.69                 | 1.12  | 20.47              | 0.20 | 1010946.4           | 4608.8  | 291021.5                                 | 31778.2 | 2936.5                                         | 119.9 | 49.8                                     | 5.8  |                                                |     |
| S20       | 906     | 92.2      | 0.46              | nd         | 0.11       | 0.080      | nd                  | nd    | nd                     | nd            | nd    | nd                 | nd   | 2.37                | 0.54 | 0.00                   | 4.88                | 0.41  | 53.8                  | 4.2   | 15.34              | 0.11 | 351334.8            | 9609.0  | 1556.3                                   | 885.7   | 6529.0                                         | 59.3  | 204.0                                    | 18.5 |                                                |     |
| S21       | 917     | 139.2     | bd                | nd         | 0.1        | 0.100      | nd                  | nd    | nd                     | nd            | nd    | nd                 | nd   | 0.76                | 0.25 | 0.0                    | 0.36                | 0.13  | 27.5                  | 4.8   | 2.63               | 0.20 | 969128.0            | 8886.2  | 759.6                                    | 80.2    | 2725.7                                         | 0.0   | 32.7                                     | 0.7  |                                                |     |
| Average   |         |           |                   |            |            |            |                     | 0.049 |                        | 80.1          | 8.8   | 0.8                |      | 0.5                 |      | 35.0                   | 8.7                 |       | 20.4                  |       | 26.0               |      |                     |         |                                          |         |                                                |       |                                          |      |                                                |     |
| STD       |         |           |                   |            |            |            |                     | 0.057 |                        | 4.2           | 11.9  | 0.6                |      | 0.8                 |      | 35.4                   | 2.2                 |       | 14.4                  |       | 24.2               |      |                     |         |                                          |         |                                                |       |                                          |      |                                                |     |

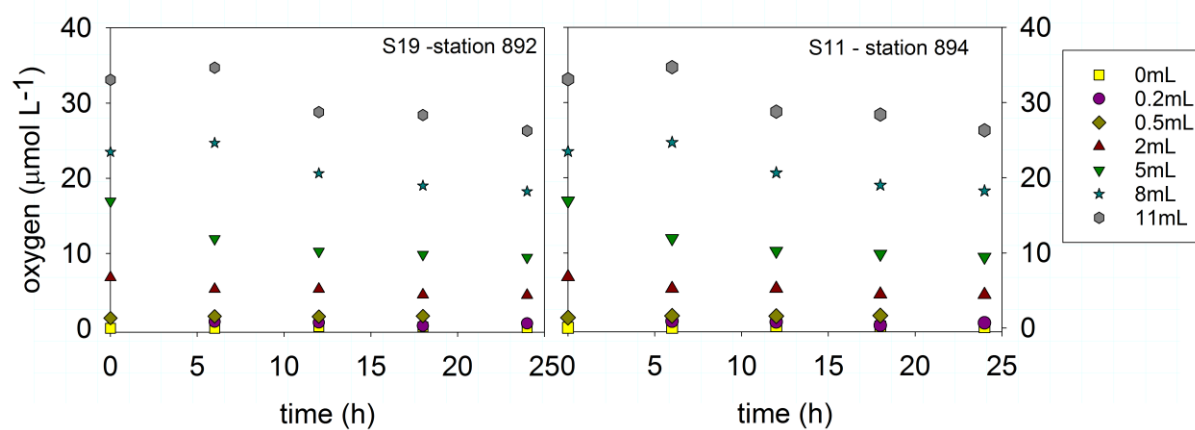

Figure S1: Dissolved oxygen concentrations inside the serum bottles during the 24h incubations of the oxygen manipulation experiments at station 892 and 894. No tracer was added to these bottles. Only the <sup>15</sup>NO<sub>3</sub><sup>-</sup> incubations received 8mL and 11mL additions of saturated site water.

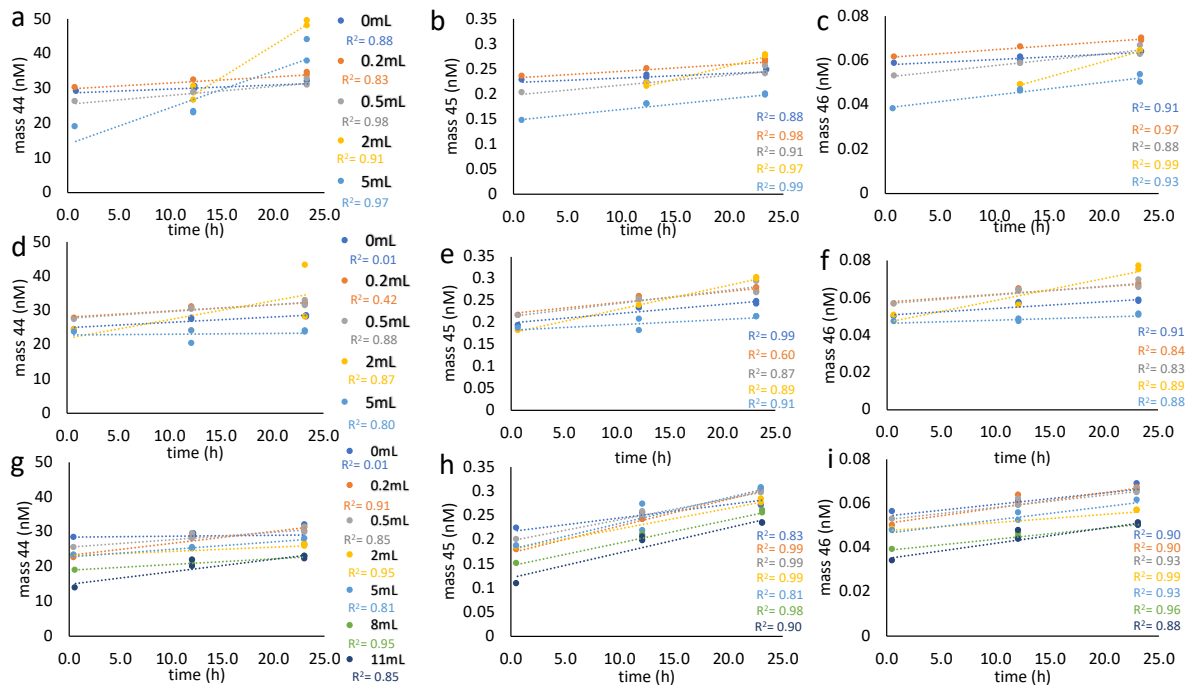

Figure S2: Examples of the production of mass 44 (a,b,c), 45 (d,e,f), and 46 (g,h,i) over 24h from the oxygen manipulation experiment performed at station 892, sample S11.  $R^2$  of the linear regression is given for each treatment and mass. Treatments in center and right panels are same as labeled in the left panel.

30

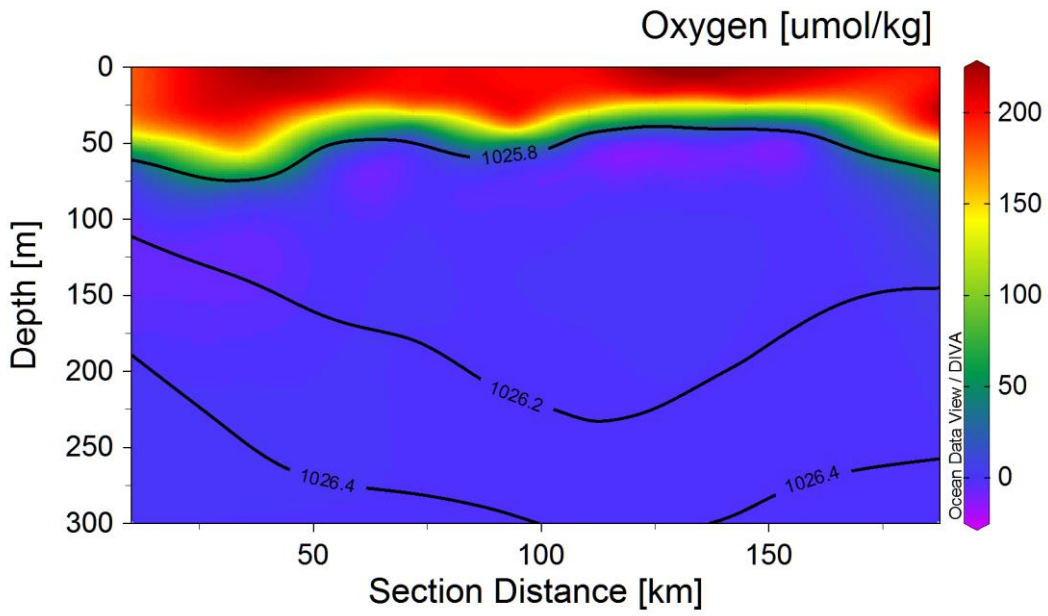

**Figure S3:** Oxygen and density contours plot from CTD data across the eddy transect 4.

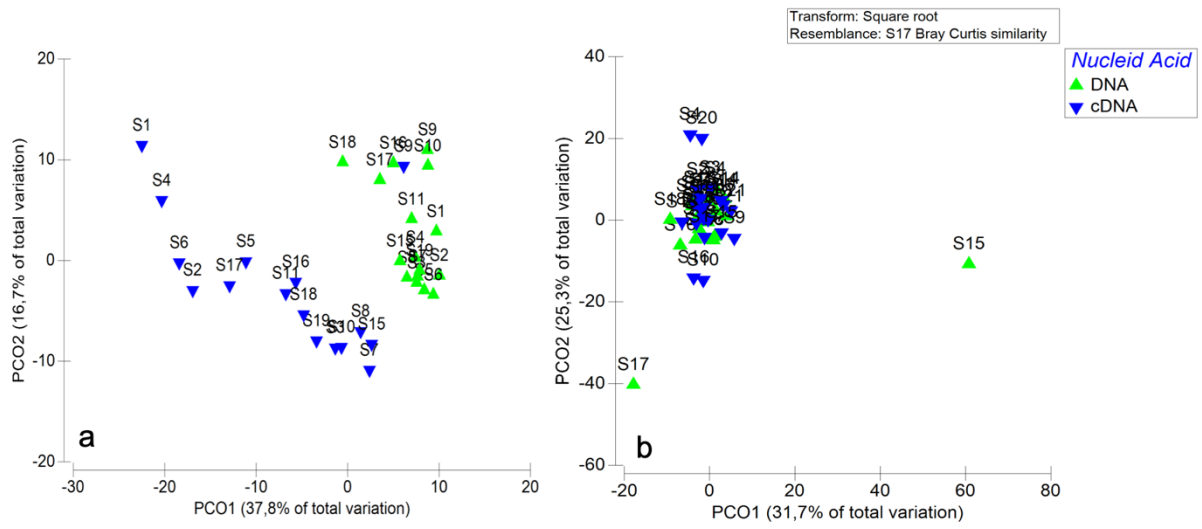

**Figure S4:** Principle component analysis of *amoA* DNA and cDNA (a) and *nirS* DNA and cDNA (b).



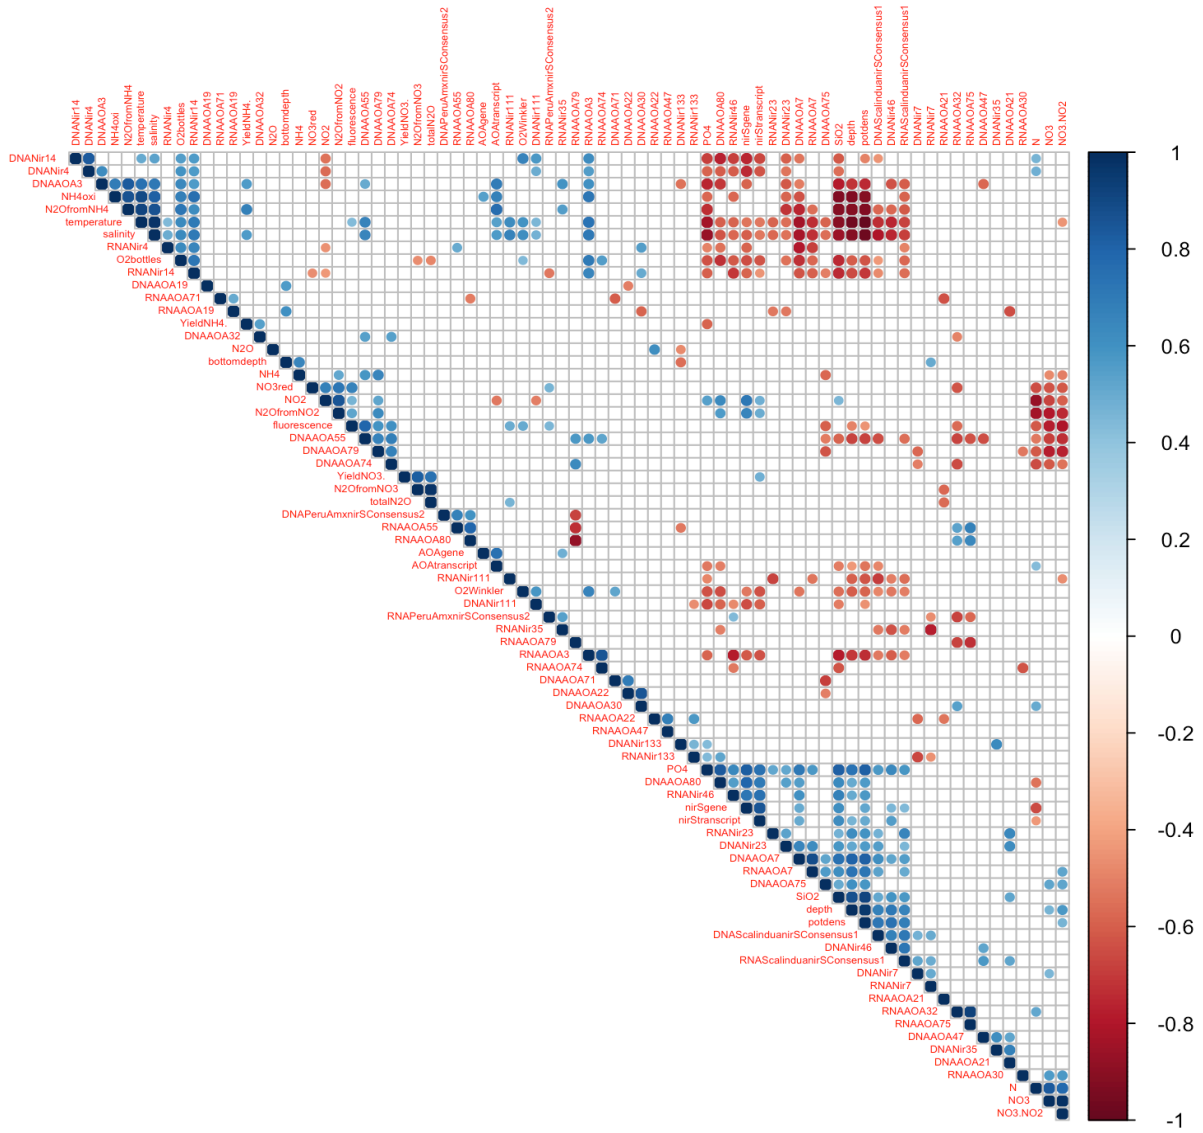

**Figure S5:** Heat map of significant positive (blue) or negative (red) correlations ( $p < 0.05$ ) based on a Spearman Rank correlation analysis.

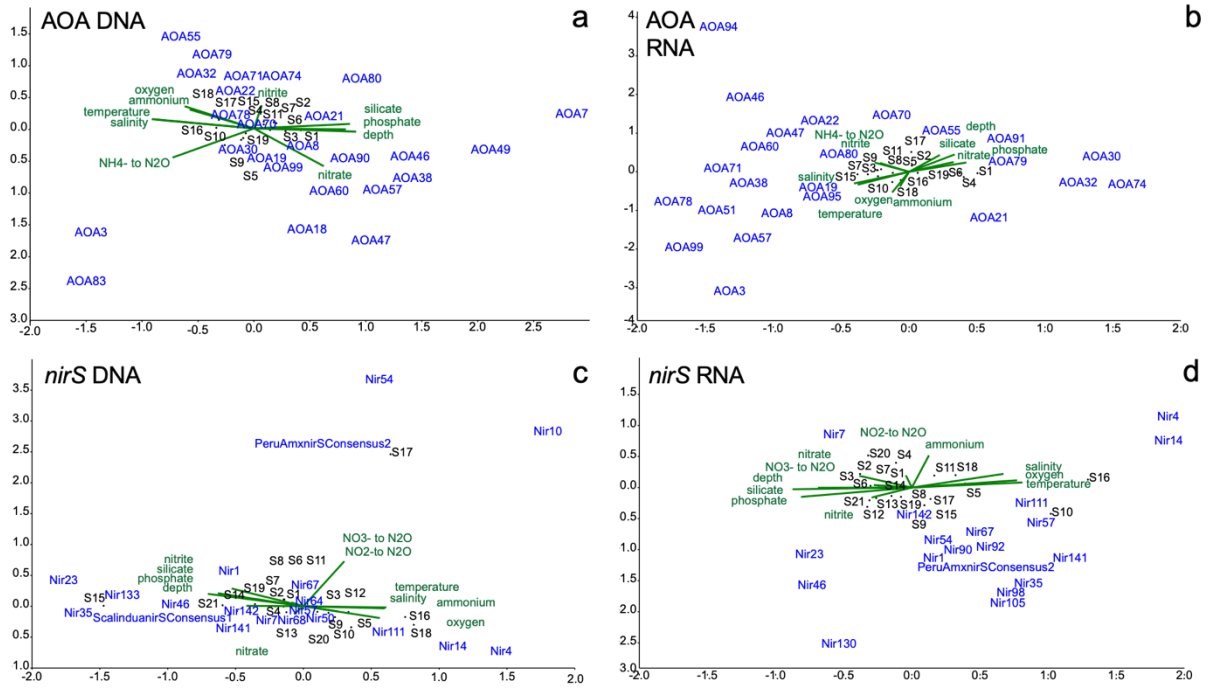

**Figure S6:** Triplot of Canonical Correspondence Analysis showing the archetype composition as a response to the environmental parameters. Upper panel *amoA* archetypes (a,b) and lower panel *nirS* archetypes (c,d). On the right is the DNA (a,c) and on the left is the cDNA (b,d).

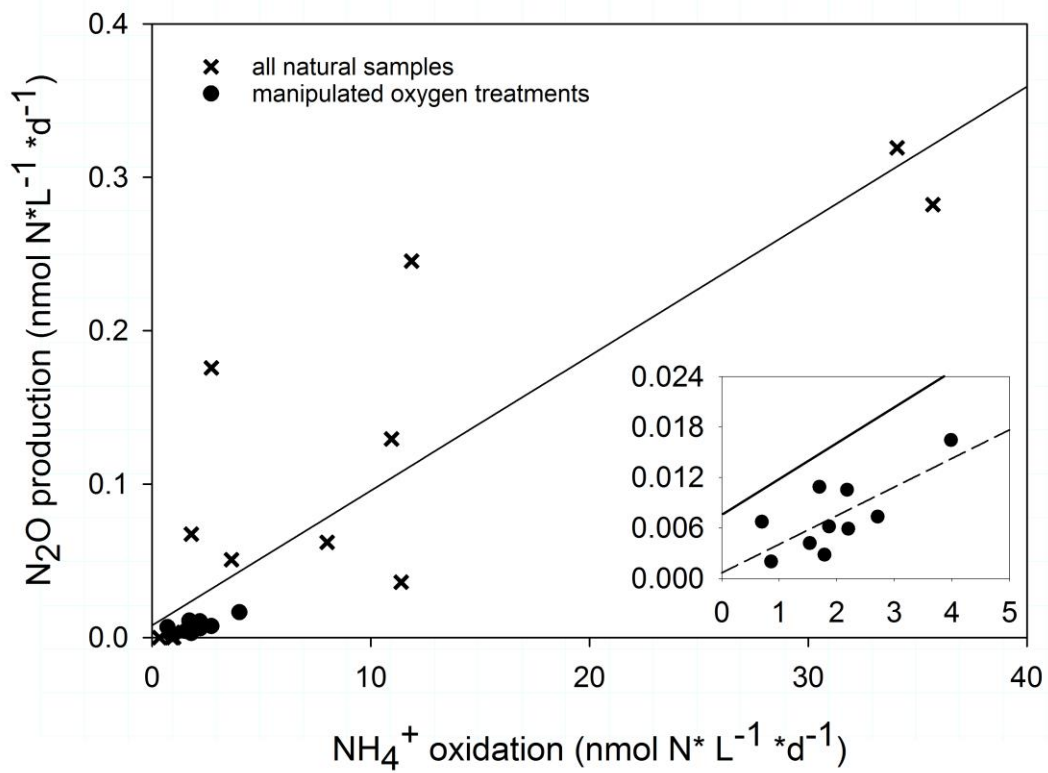

**Figure S7:** Scatter plot of AO versus N<sub>2</sub>O production from NH<sub>4</sub><sup>+</sup> with linear fit through all data ( $y = 0.0088x + 0.0080$ ,  $R^2 = 0.75$ ,  $p < 0.0001$ ). Zoom in shows manipulated treatments with small AO rates and linear fit through treatments ( $y = 0.0034x + 0.0007$ ,  $R^2 = 0.73$ ,  $p < 0.0001$ ).

55

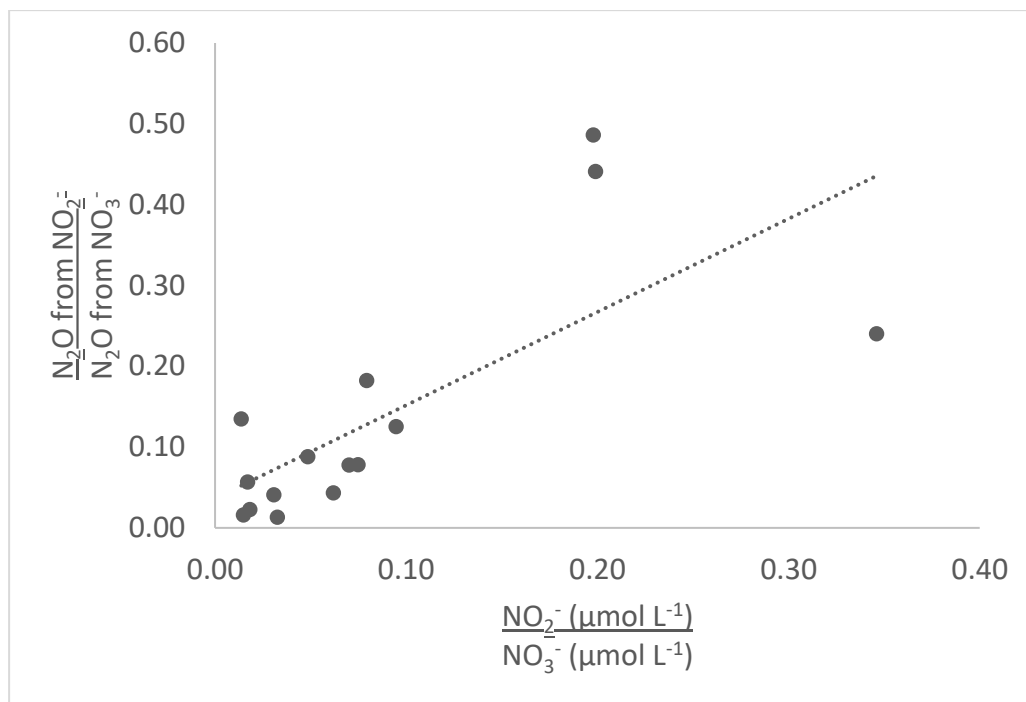

**Figure S8:** Scatter plot of the ratio of N<sub>2</sub>O production rates from NO<sub>2</sub><sup>-</sup> and that from NO<sub>3</sub><sup>-</sup> plotted against ratio of NO<sub>2</sub><sup>-</sup> and NO<sub>3</sub><sup>-</sup> concentrations. Linear fit ( $y = 1.153 x + 0.0365$   $R^2 = 0.62$ ,  $p < 0.0001$ ).

60

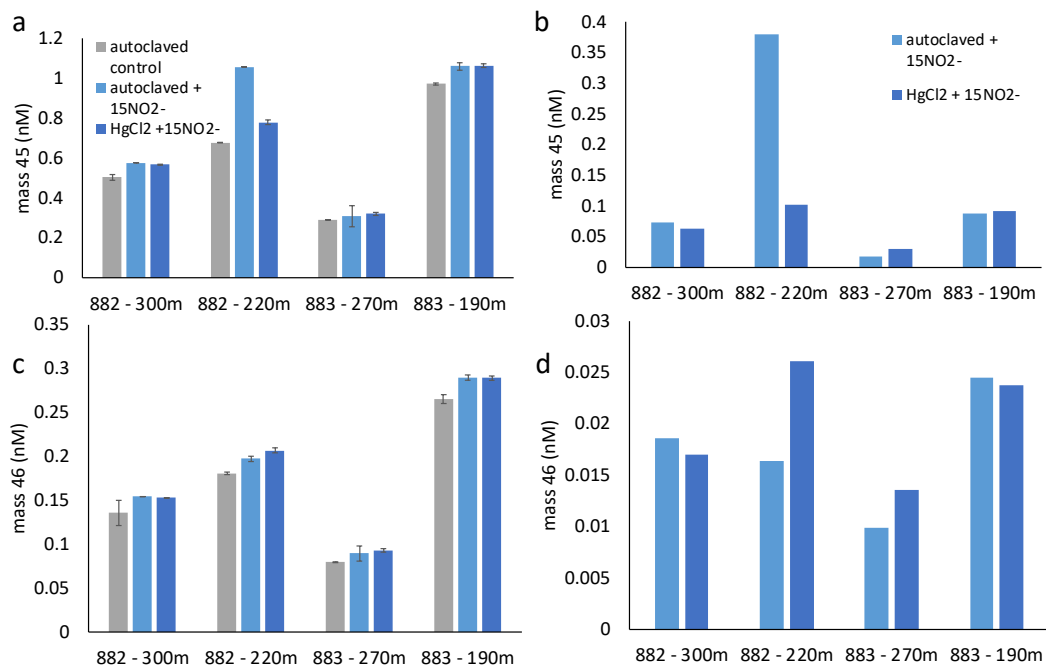

65

70
